# Supplementary material
Source: PubMed Central journal article supplement (PMC2723006)

**Power Contours (PROMISE)**

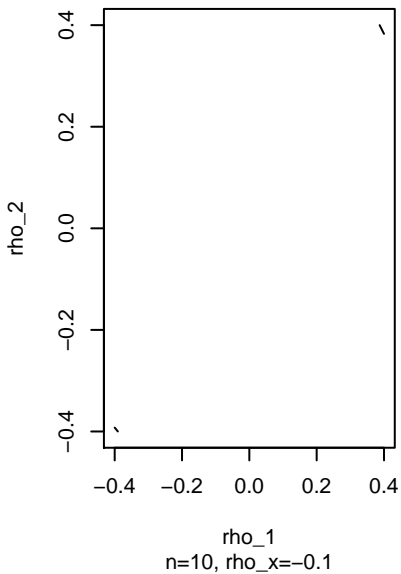

**Power Contours (CC)**

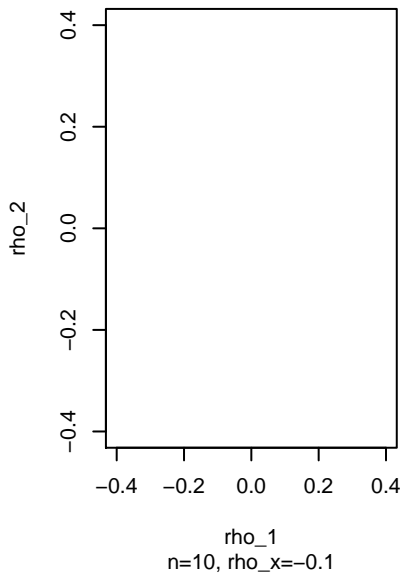

**Power Contours (PC)**

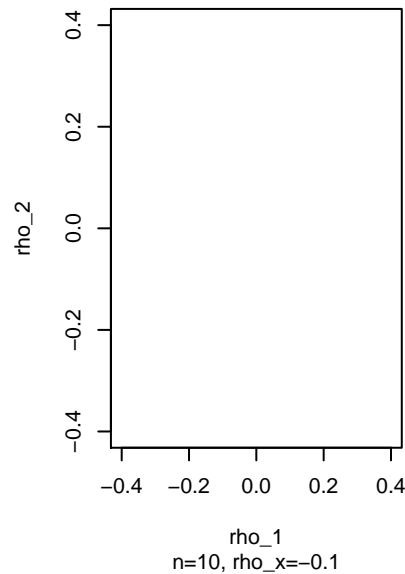

**Power Contours (X2 only)**

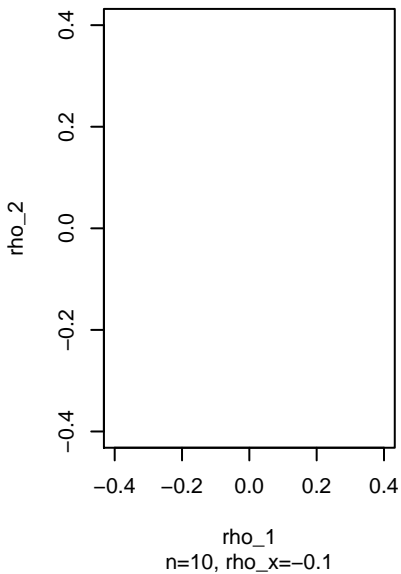

**Power Contours (X1 only)**



**Power Contours (OV)**



**Power Contours (PROMISE)**

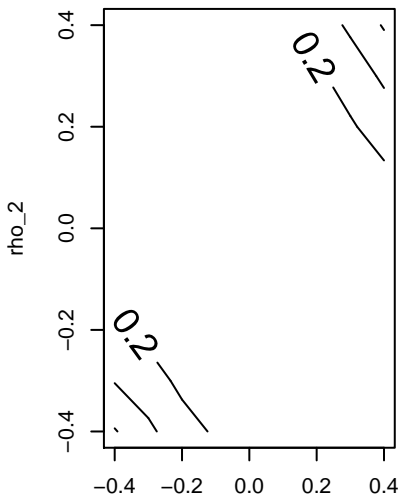

$\rho_{1,1}$   
n=20,  $\rho_{1,x}=-0.1$

**Power Contours (CC)**

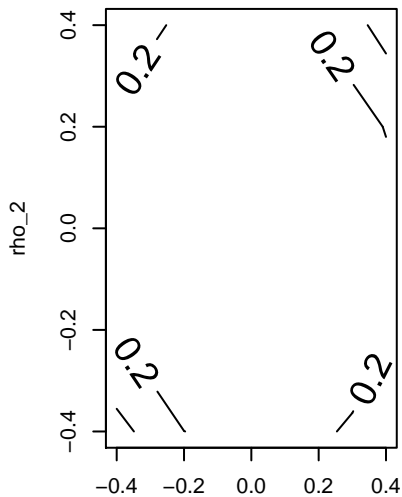

$\rho_{1,1}$   
n=20,  $\rho_{1,x}=-0.1$

**Power Contours (PC)**

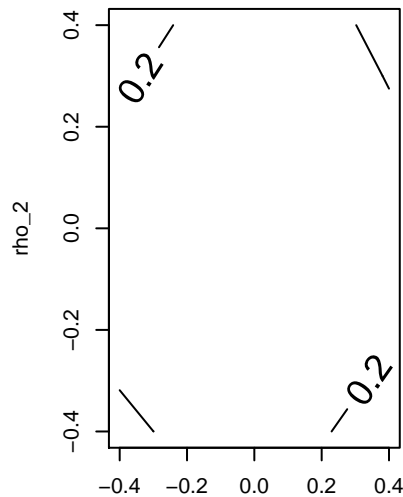

$\rho_{1,1}$   
n=20,  $\rho_{1,x}=-0.1$

**Power Contours (X2 only)**

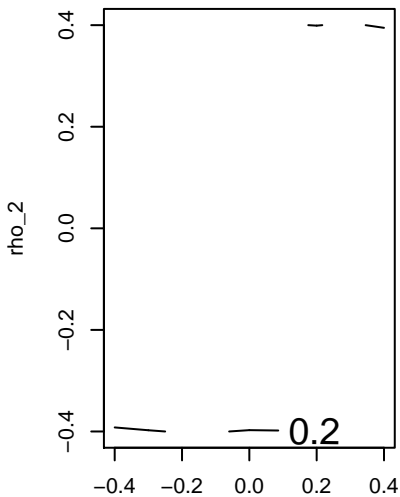

$\rho_{1,1}$   
n=20,  $\rho_{1,x}=-0.1$

**Power Contours (X1 only)**

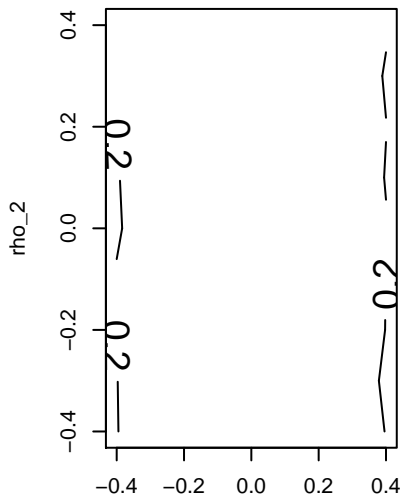

$\rho_{1,1}$   
n=20,  $\rho_{1,x}=-0.1$

**Power Contours (OV)**

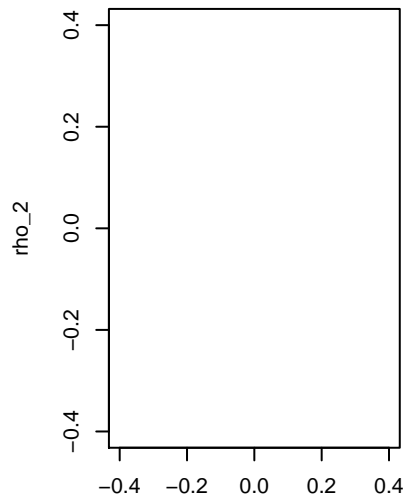

$\rho_{1,1}$   
n=20,  $\rho_{1,x}=-0.1$

**Power Contours (PROMISE)**

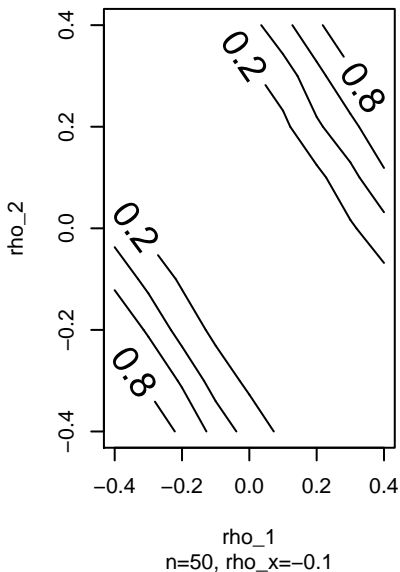

**Power Contours (CC)**

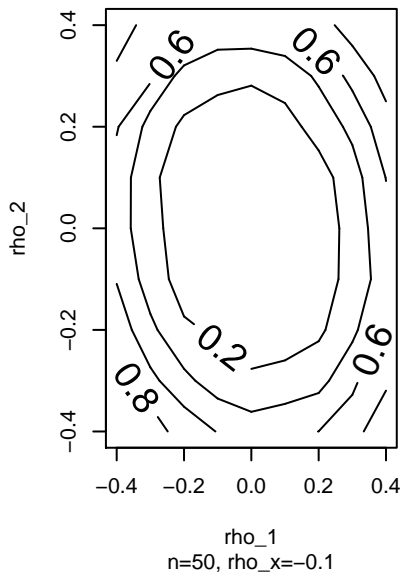

**Power Contours (PC)**

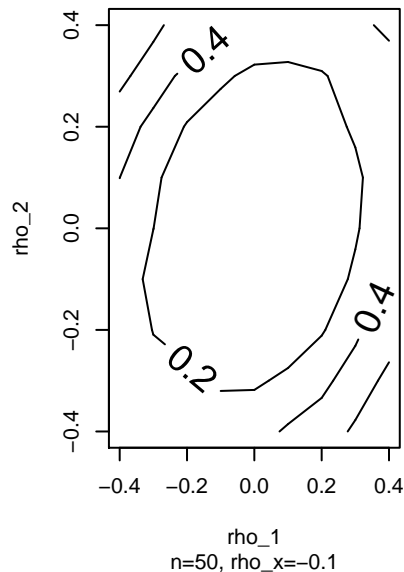

**Power Contours (X2 only)**

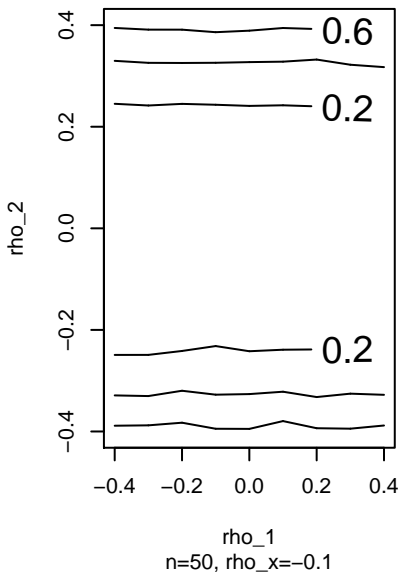

**Power Contours (X1 only)**

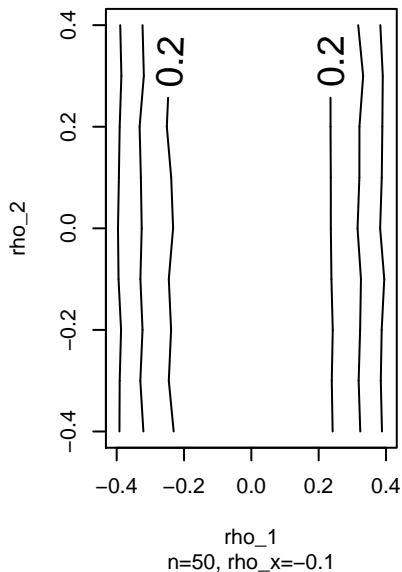

**Power Contours (OV)**

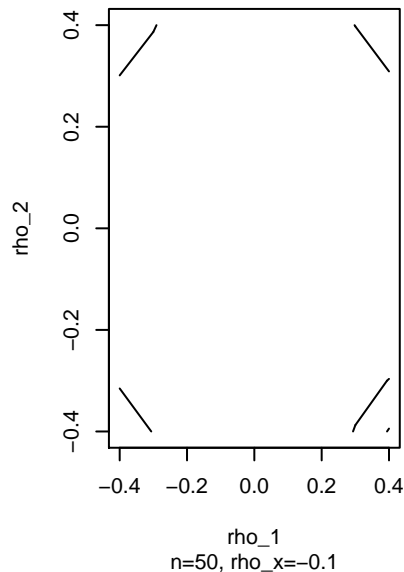

**Power Contours (PROMISE)**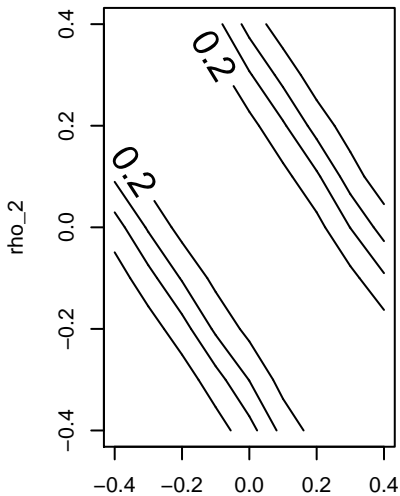

$\rho_1$   
 $n=100, \rho_{0,x}=-0.1$

**Power Contours (CC)**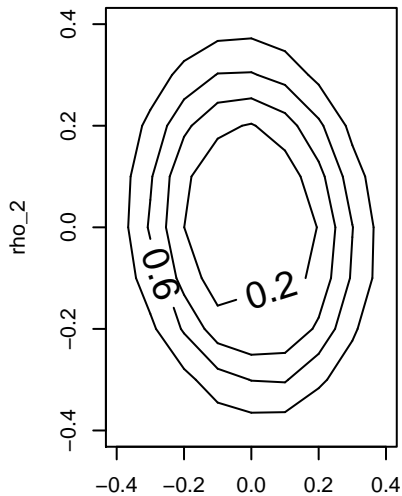

$\rho_1$   
 $n=100, \rho_{0,x}=-0.1$

**Power Contours (PC)**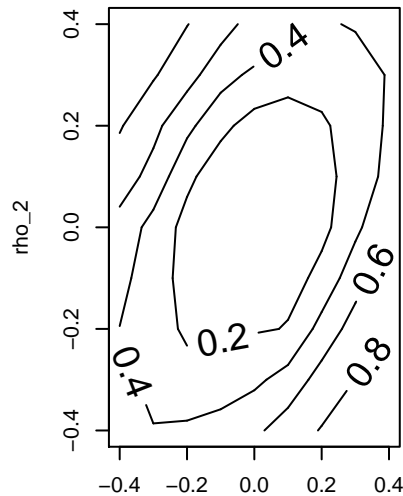

$\rho_1$   
 $n=100, \rho_{0,x}=-0.1$

**Power Contours (X2 only)**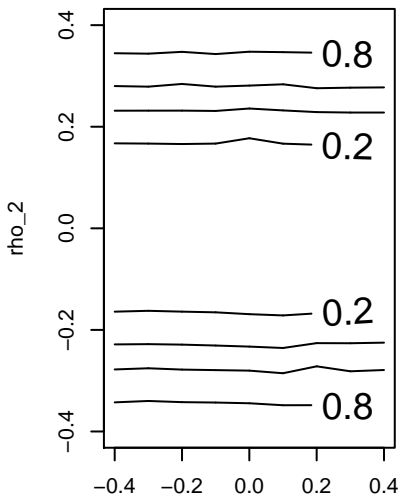

$\rho_1$   
 $n=100, \rho_{0,x}=-0.1$

**Power Contours (X1 only)**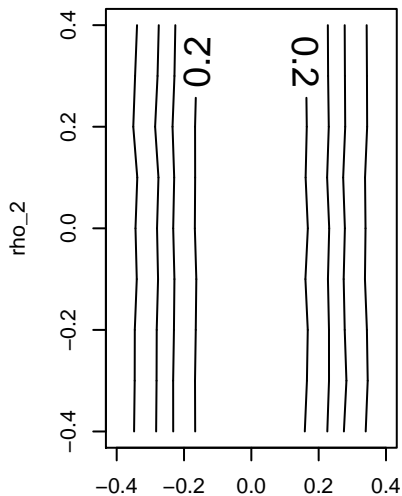

$\rho_1$   
 $n=100, \rho_{0,x}=-0.1$

**Power Contours (OV)**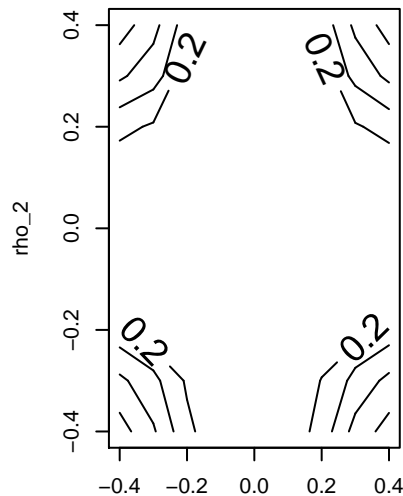

$\rho_1$   
 $n=100, \rho_{0,x}=-0.1$

**Power Contours (PROMISE)**

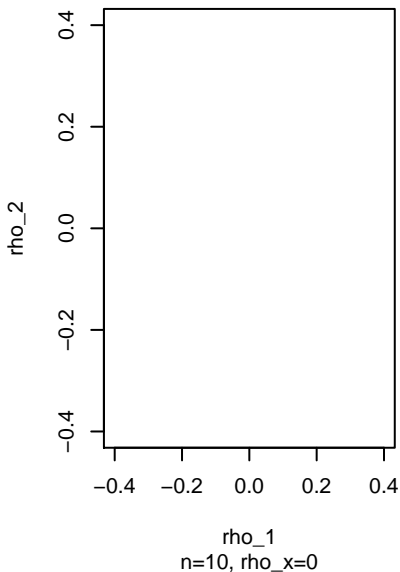

**Power Contours (CC)**

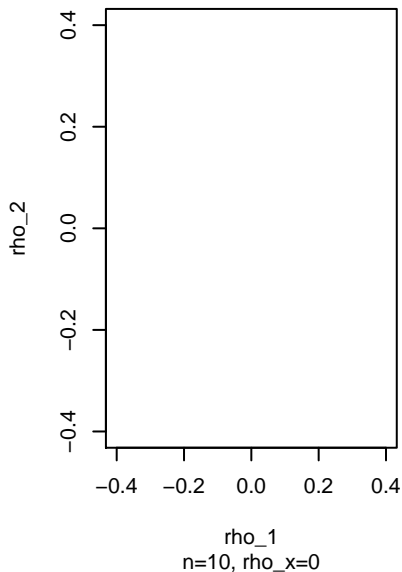

**Power Contours (PC)**

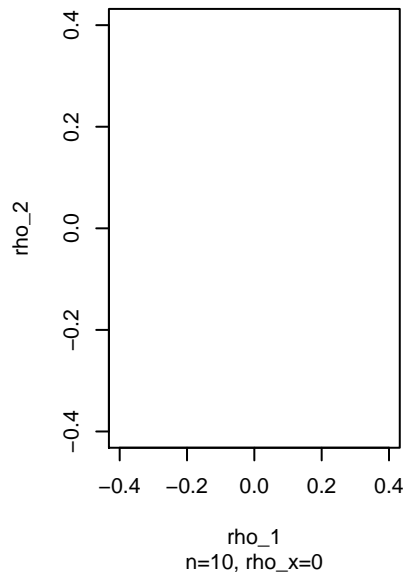

**Power Contours (X2 only)**



**Power Contours (X1 only)**



**Power Contours (OV)**



**Power Contours (PROMISE)**

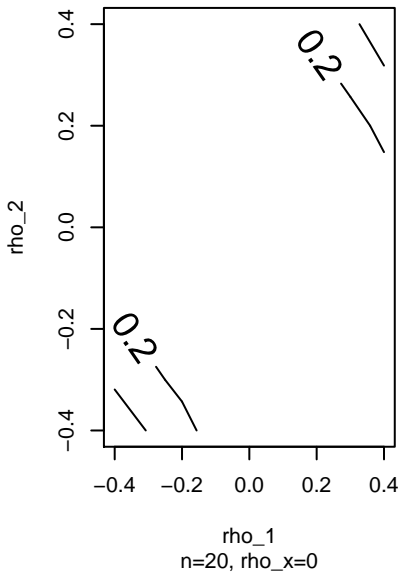

**Power Contours (CC)**

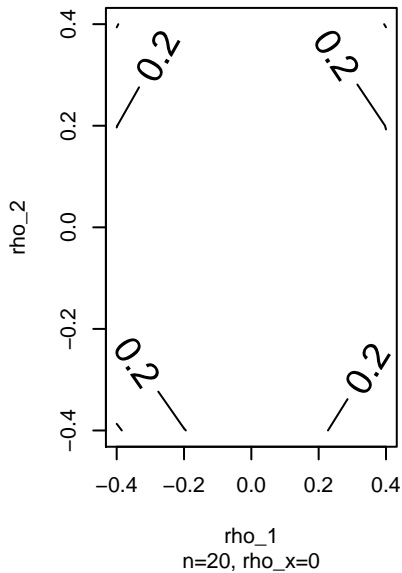

**Power Contours (PC)**

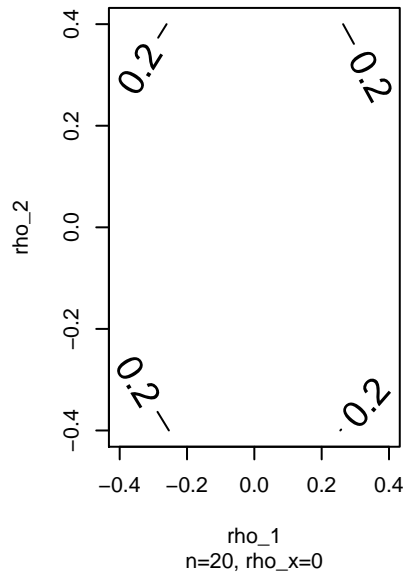

**Power Contours (X2 only)**

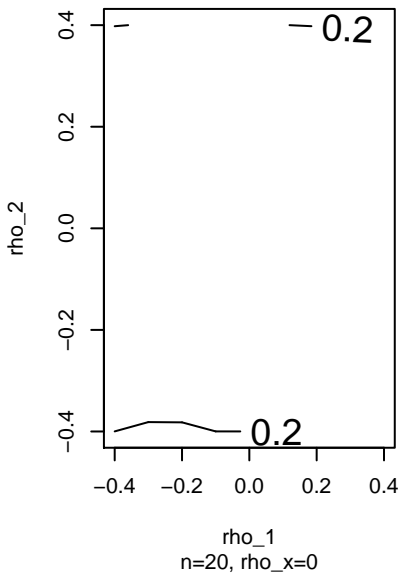

**Power Contours (X1 only)**

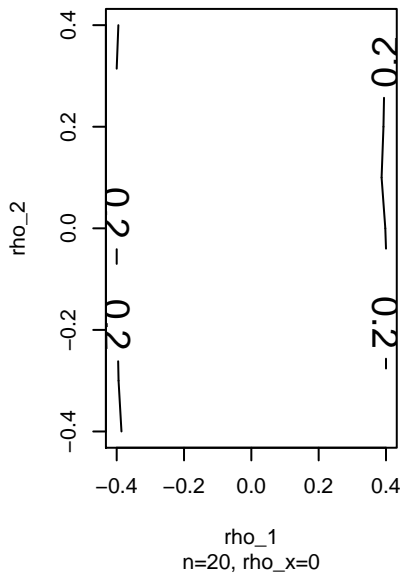

**Power Contours (OV)**

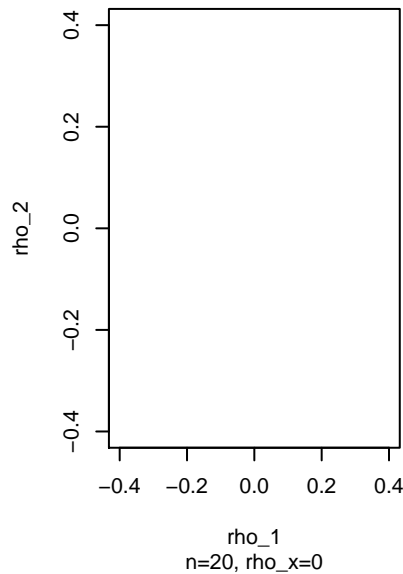

**Power Contours (PROMISE)**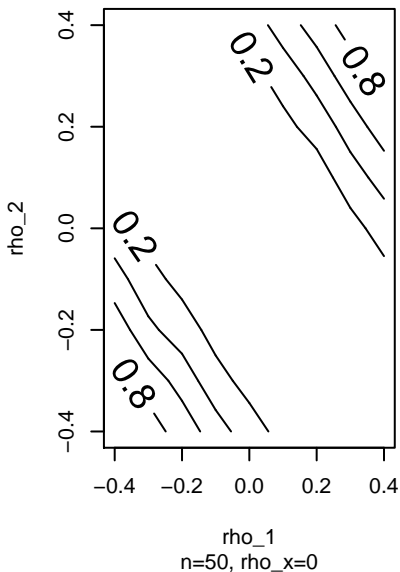**Power Contours (CC)**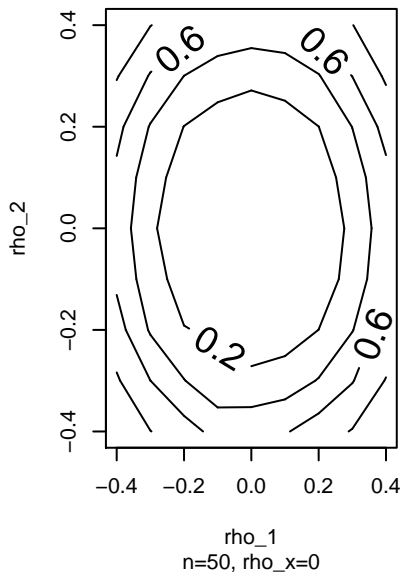**Power Contours (PC)**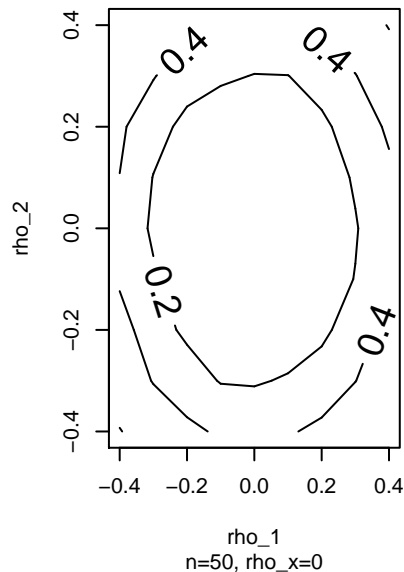**Power Contours (X2 only)**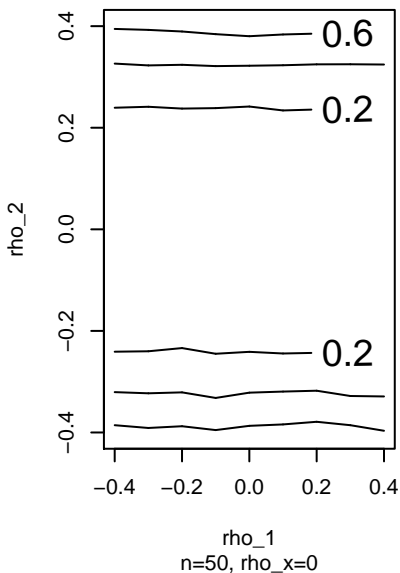**Power Contours (X1 only)**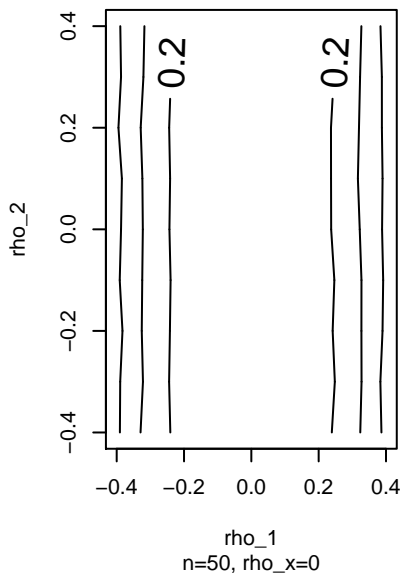**Power Contours (OV)**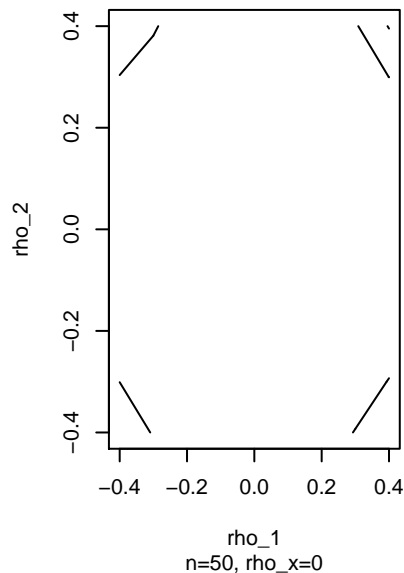

**Power Contours (PROMISE)**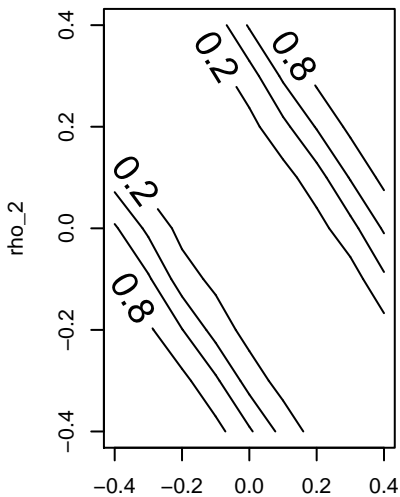

$\rho_1$   
 $n=100, \rho_{0,x}=0$

**Power Contours (CC)**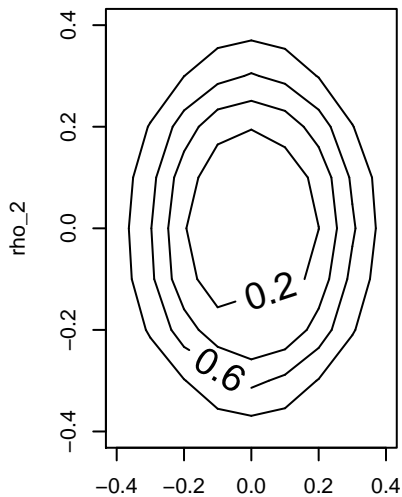

$\rho_1$   
 $n=100, \rho_{0,x}=0$

**Power Contours (PC)**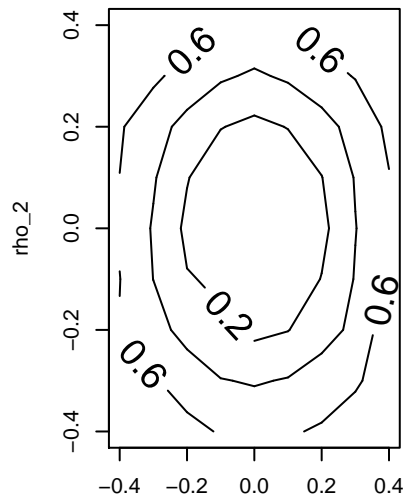

$\rho_1$   
 $n=100, \rho_{0,x}=0$

**Power Contours (X2 only)**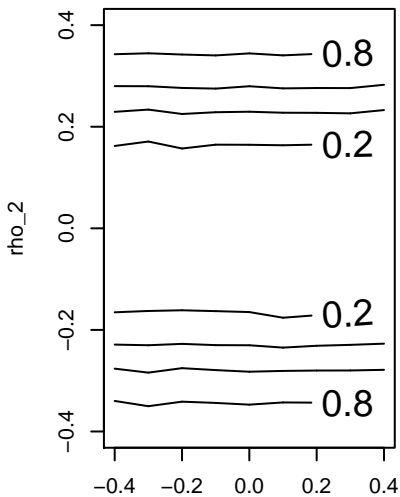

$\rho_1$   
 $n=100, \rho_{0,x}=0$

**Power Contours (X1 only)**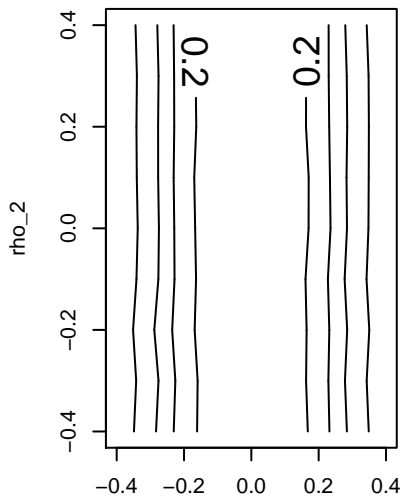

$\rho_1$   
 $n=100, \rho_{0,x}=0$

**Power Contours (OV)**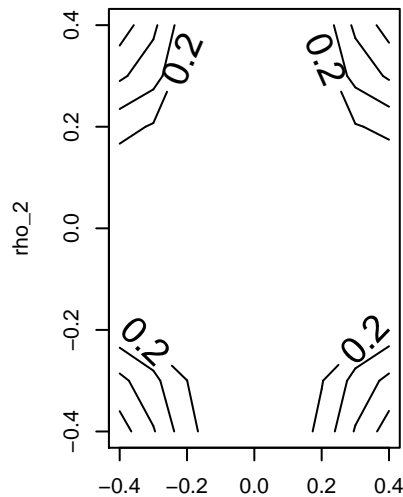

$\rho_1$   
 $n=100, \rho_{0,x}=0$



**Power Contours (PROMISE)**

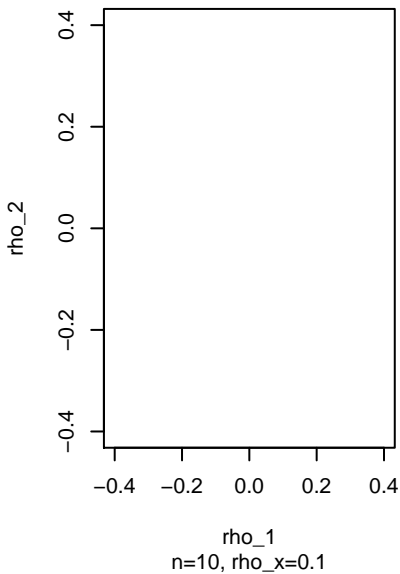

**Power Contours (CC)**

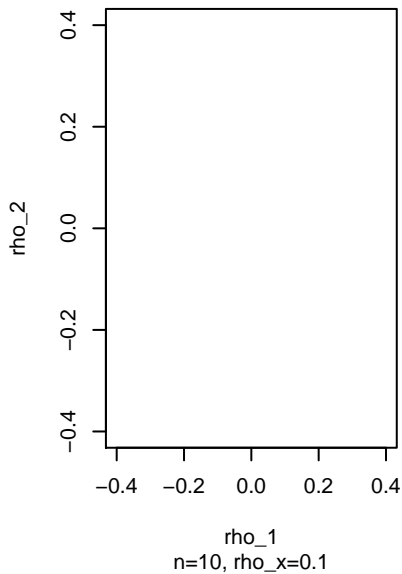

**Power Contours (PC)**

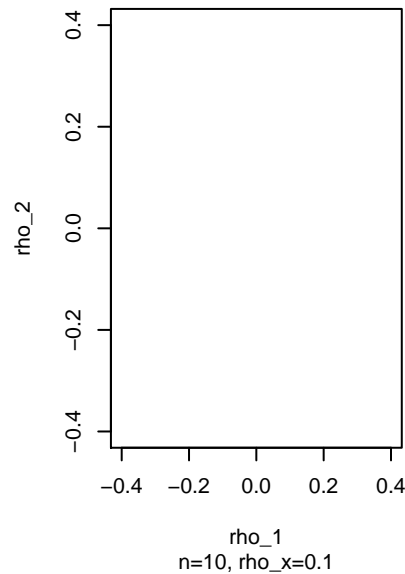

**Power Contours (X2 only)**



**Power Contours (X1 only)**



**Power Contours (OV)**



**Power Contours (PROMISE)**

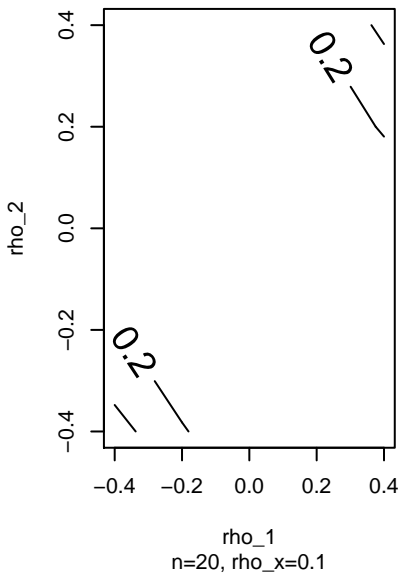

**Power Contours (CC)**

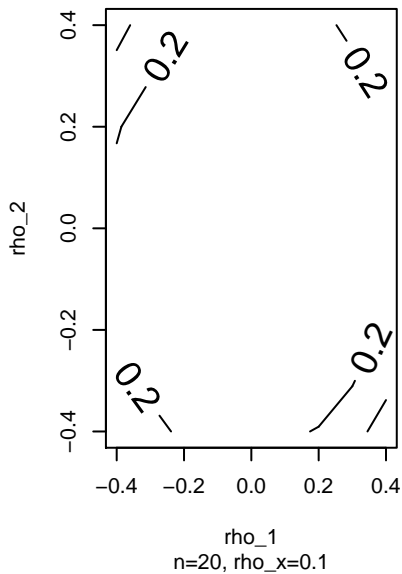

**Power Contours (PC)**

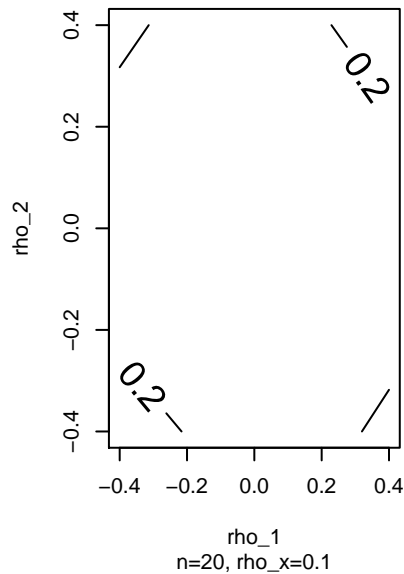

**Power Contours (X2 only)**

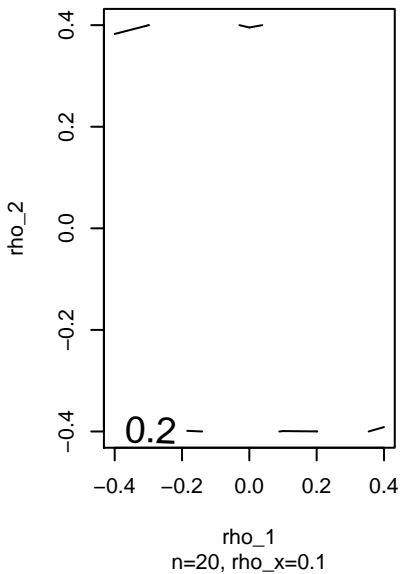

**Power Contours (X1 only)**

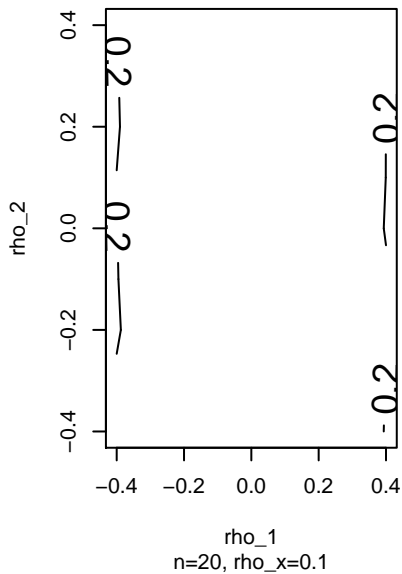

**Power Contours (OV)**

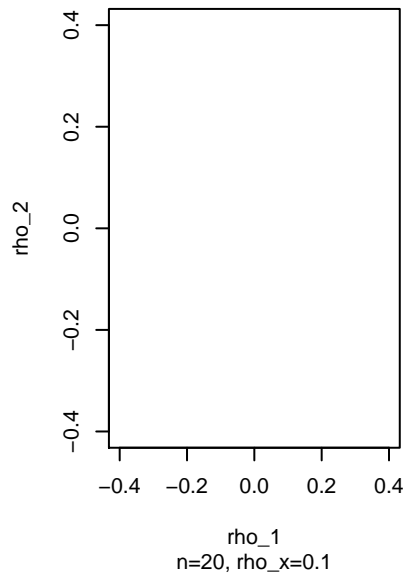

**Power Contours (PROMISE)**

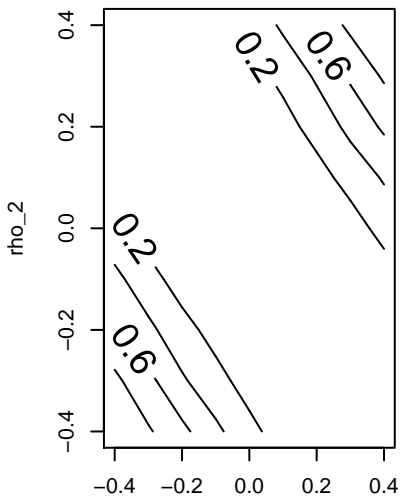

$\rho_1$   
n=50,  $\rho_x=0.1$

**Power Contours (CC)**

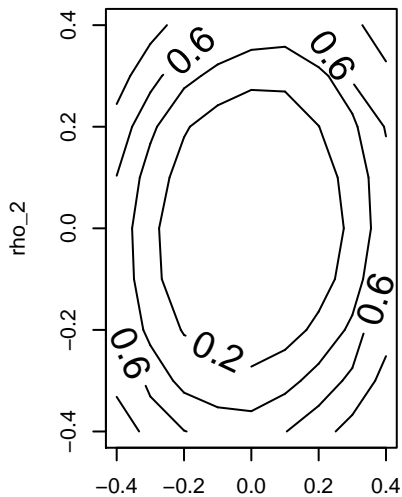

$\rho_1$   
n=50,  $\rho_x=0.1$

**Power Contours (PC)**

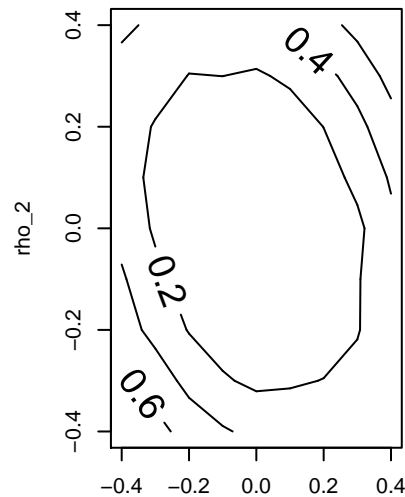

$\rho_1$   
n=50,  $\rho_x=0.1$

**Power Contours (X2 only)**

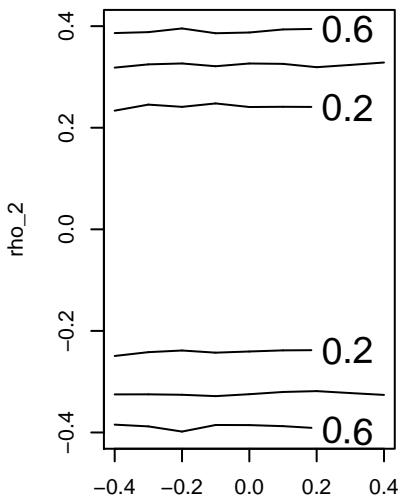

$\rho_1$   
n=50,  $\rho_x=0.1$

**Power Contours (X1 only)**

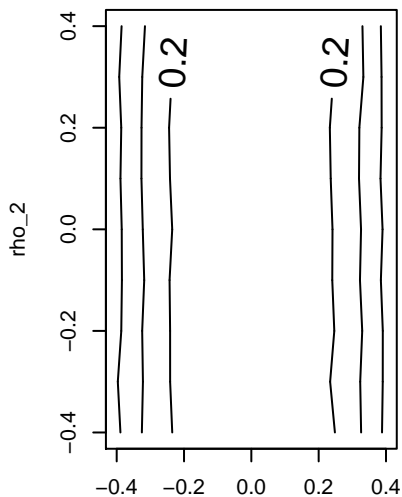

$\rho_1$   
n=50,  $\rho_x=0.1$

**Power Contours (OV)**

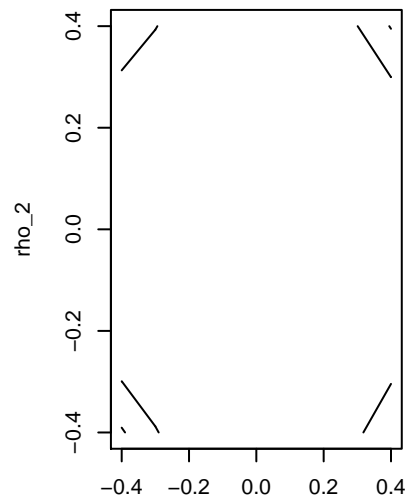

$\rho_1$   
n=50,  $\rho_x=0.1$

**Power Contours (PROMISE)**

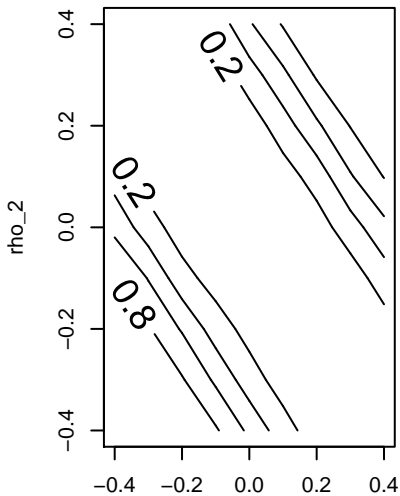

$\rho_1$   
n=100,  $\rho_x=0.1$

**Power Contours (CC)**

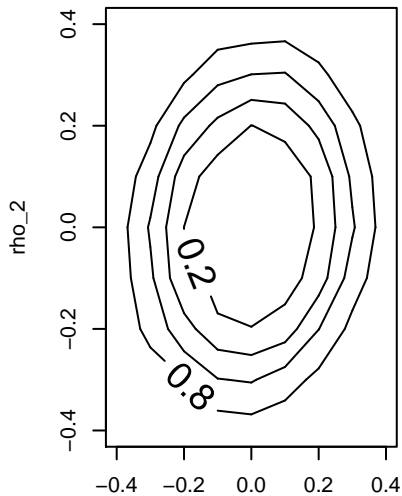

$\rho_1$   
n=100,  $\rho_x=0.1$

**Power Contours (PC)**

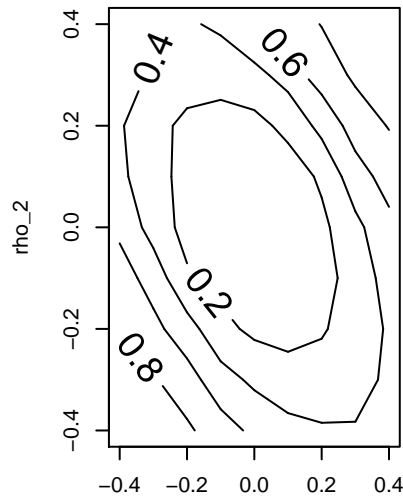

$\rho_1$   
n=100,  $\rho_x=0.1$

**Power Contours (X2 only)**

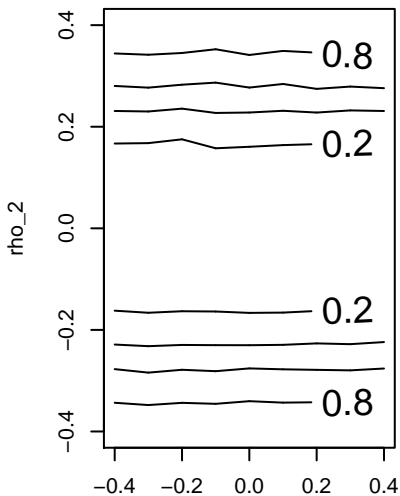

$\rho_1$   
n=100,  $\rho_x=0.1$

**Power Contours (X1 only)**

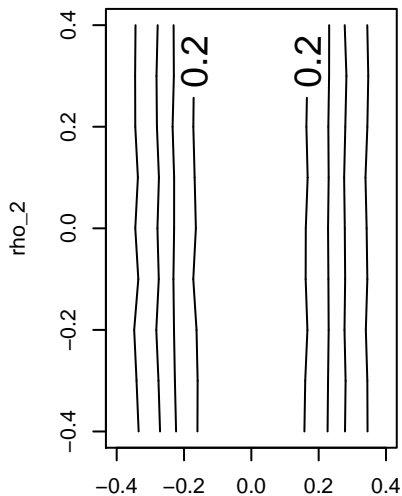

$\rho_1$   
n=100,  $\rho_x=0.1$

**Power Contours (OV)**

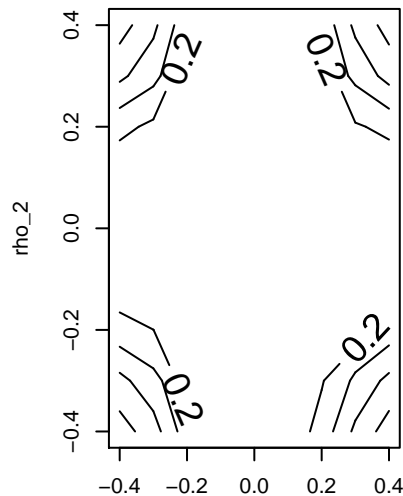

$\rho_1$   
n=100,  $\rho_x=0.1$

**Power Contours (PROMISE)**

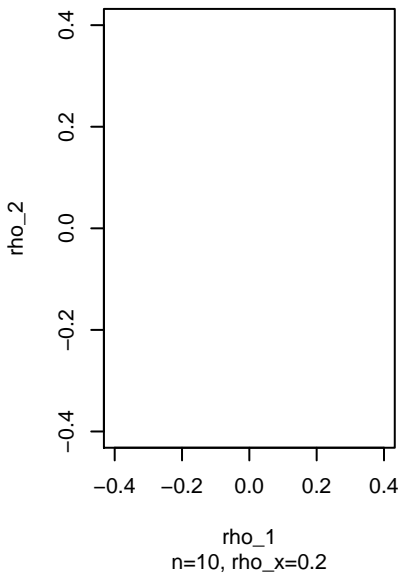

**Power Contours (CC)**

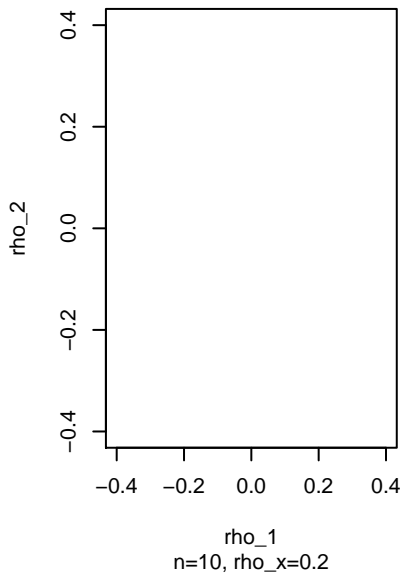

**Power Contours (PC)**

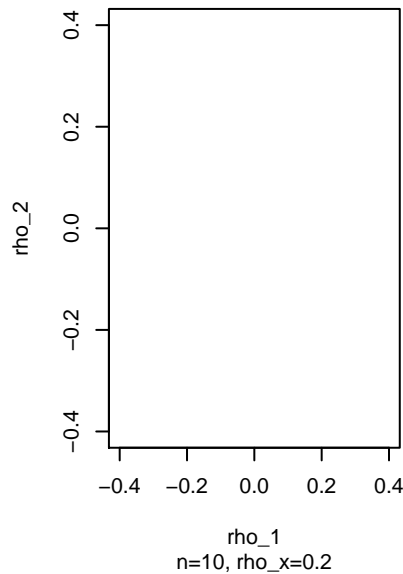

**Power Contours (X2 only)**



**Power Contours (X1 only)**



**Power Contours (OV)**



**Power Contours (PROMISE)**

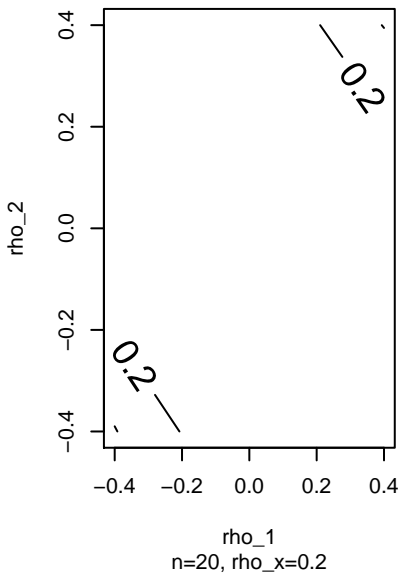

**Power Contours (CC)**

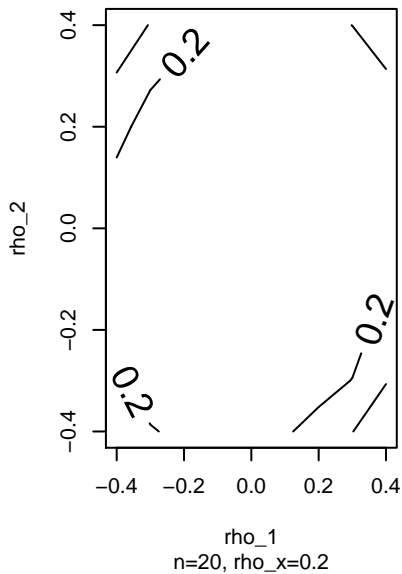

**Power Contours (PC)**

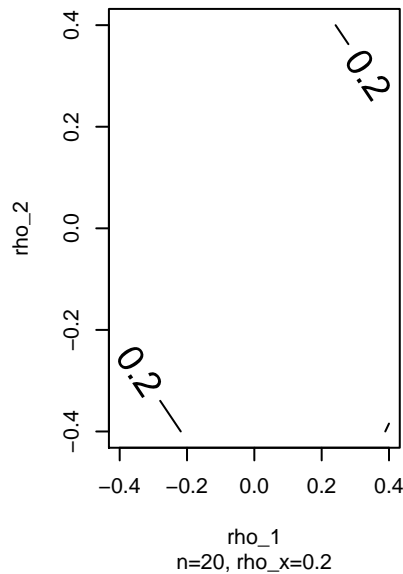

**Power Contours (X2 only)**

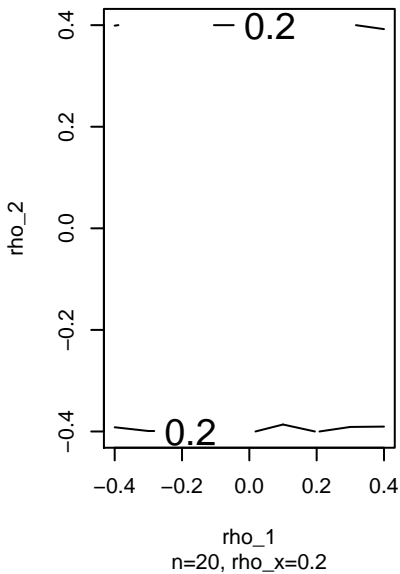

**Power Contours (X1 only)**

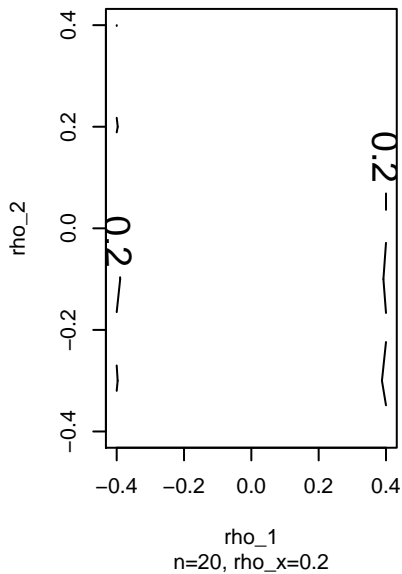

**Power Contours (OV)**

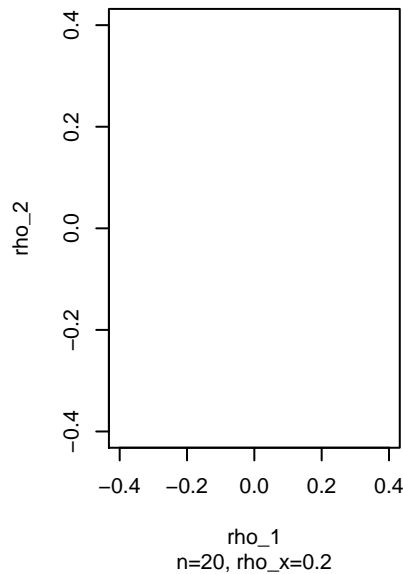

**Power Contours (PROMISE)**

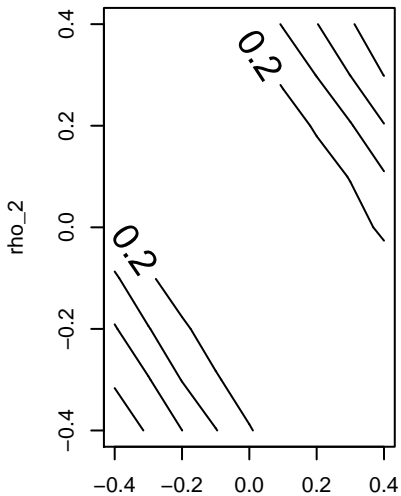

$\rho_1$   
n=50,  $\rho_x=0.2$

**Power Contours (CC)**

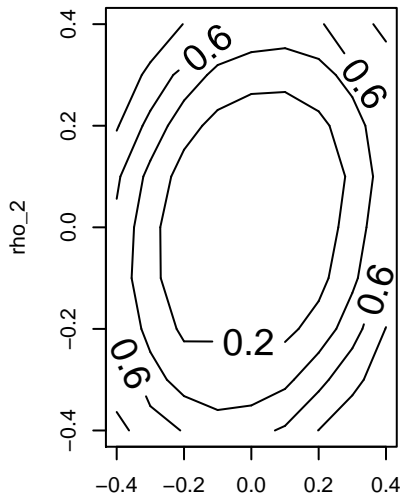

$\rho_1$   
n=50,  $\rho_x=0.2$

**Power Contours (PC)**

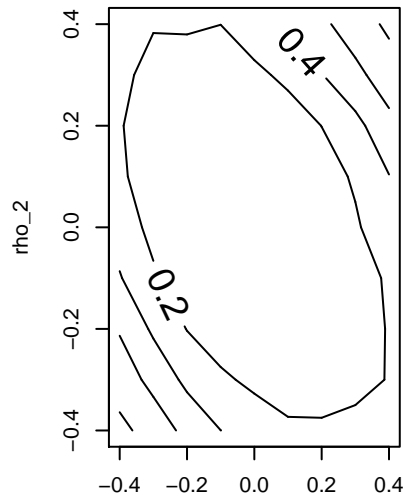

$\rho_1$   
n=50,  $\rho_x=0.2$

**Power Contours (X2 only)**

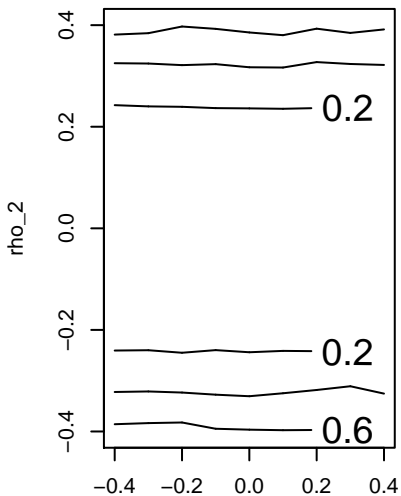

$\rho_1$   
n=50,  $\rho_x=0.2$

**Power Contours (X1 only)**

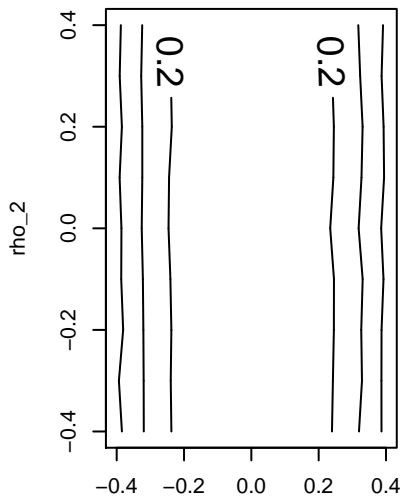

$\rho_1$   
n=50,  $\rho_x=0.2$

**Power Contours (OV)**

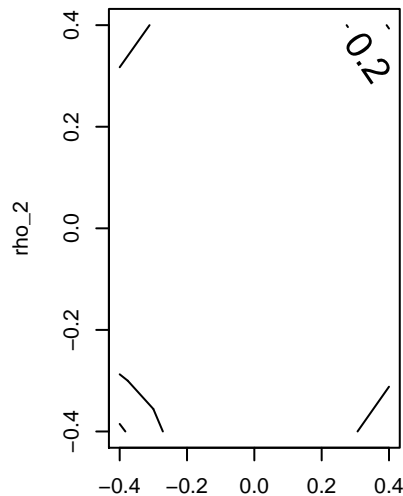

$\rho_1$   
n=50,  $\rho_x=0.2$

**Power Contours (PROMISE)**

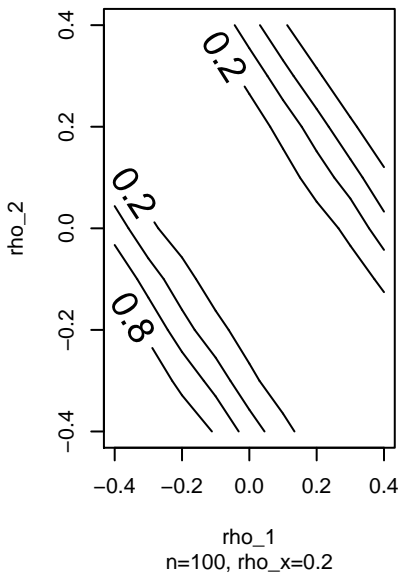

**Power Contours (CC)**

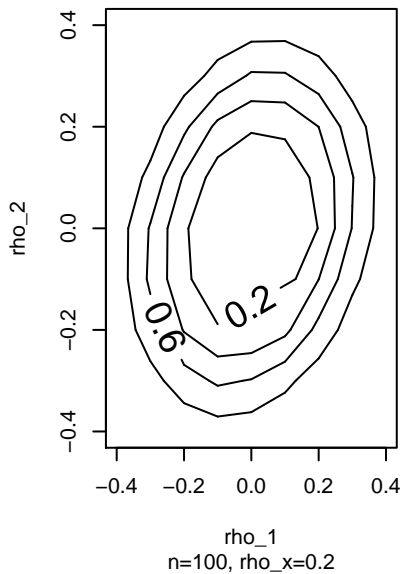

**Power Contours (PC)**

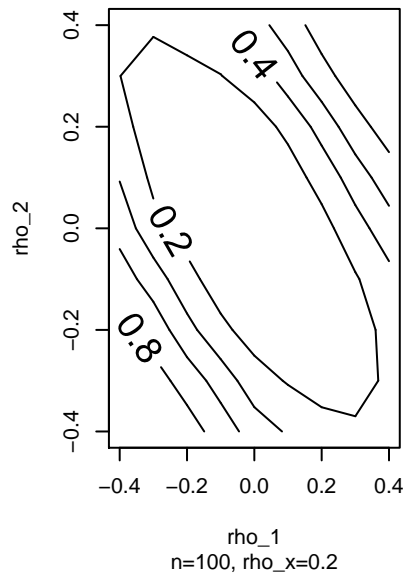

**Power Contours (X2 only)**

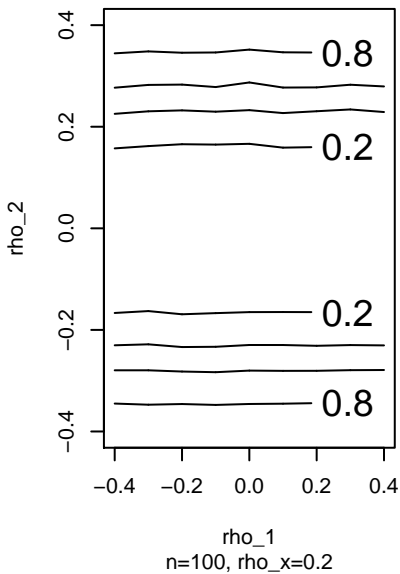

**Power Contours (X1 only)**

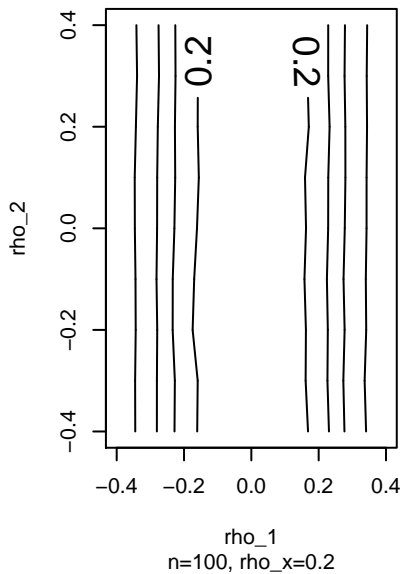

**Power Contours (OV)**

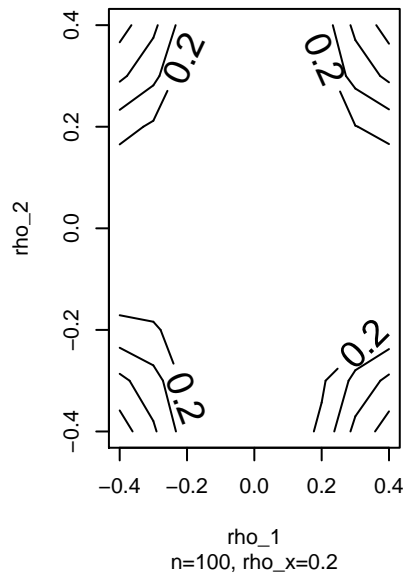

Supplement: btp357_1.pdf [file btp357_1.pdf]
